# Supplementary material for: meth-SemiCancer: a cancer subtype classification framework via semi-supervised learning utilizing DNA methylation profiles
Source: Springer Nature journal article supplement (doi:10.1186/s12859-023-05272-6), 2023-04-26
Supplement: MOESM1 [file 12859_2023_5272_MOESM1_ESM.pdf]

### Supplementary Material S1.

Average performance results of meth-SemiCancer for breast cancer subtype classification based on the different imputation strategies, conducting 10-fold cross validation.

|           | Median imp   | Mean imp     | KNN imp |
|-----------|--------------|--------------|---------|
| Accuracy  | <b>0.841</b> | 0.838        | 0.833   |
| F1-score  | <b>0.829</b> | 0.828        | 0.824   |
| MCC       | <b>0.752</b> | 0.750        | 0.738   |
| Recall    | 0.725        | <b>0.732</b> | 0.722   |
| Precision | <b>0.822</b> | 0.803        | 0.803   |
| Kappa     | <b>0.743</b> | <b>0.743</b> | 0.734   |

## Supplementary Material S2. The overall architecture of meth-SemiCancer.

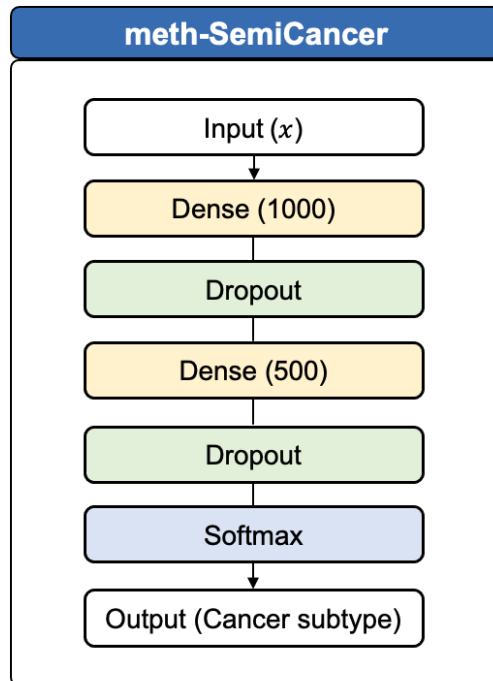

### Loss function for each training phase

(1) Pre-training

$$L_{PT} = -\frac{1}{n} \sum_{j=1}^n \sum_{i=1}^c y_i^j \log(\hat{y}_i^j)$$

(2) Fine-tuning

$$L_{FT} = -\frac{1}{n} \sum_{j=1}^n \sum_{i=1}^c y_i^j \log(\hat{y}_i^j) - \alpha(t) \frac{1}{m} \sum_{j=1}^m \sum_{i=1}^c y_i^j \log(\hat{Y}_i^j)$$

**Supplementary Material S3.**

Optimization results of meth-SemiCancer and the baseline methods with the different combination of the parameters. Grid search was adopted for the model tuning, and the hyperparameters showing the best accuracy were selected.

**meth-SemiCancer**

| # of hidden nodes | Pre-training  |               | Fine-tuning   |               | Dropout    | Alpha       | Accuracy      |
|-------------------|---------------|---------------|---------------|---------------|------------|-------------|---------------|
|                   | Learning rate | Trining epoch | Learning rate | Trining epoch |            |             |               |
| 1000-500          | 1e-5          | 1000          | 1e-3          | 2000          | 0.7        | 0.001       | 0.8018        |
| 1000-500          | 1e-5          | 1000          | 1e-3          | 2000          | 0.7        | 0.005       | 0.8113        |
| 1000-500          | 1e-5          | 1000          | 1e-3          | 2000          | 0.7        | 0.01        | 0.8113        |
| 1000-500          | 1e-5          | 1000          | 1e-3          | 2000          | 0.7        | 0.05        | 0.8018        |
| 1000-500          | 1e-5          | 1000          | 1e-3          | 2000          | 0.7        | 0.1         | 0.8018        |
| 1000-500          | 1e-5          | 1000          | 1e-3          | 2000          | 0.7        | 0.5         | 0.8018        |
| 1000-500          | 1e-3          | 1000          | 1e-3          | 2000          | 0.7        | 0.001       | 0.8113        |
| 1000-500          | 1e-3          | 1000          | 1e-3          | 2000          | 0.7        | 0.005       | 0.8113        |
| 1000-500          | 1e-3          | 1000          | 1e-3          | 2000          | 0.7        | 0.01        | 0.8207        |
| 1000-500          | 1e-3          | 1000          | 1e-3          | 2000          | 0.7        | 0.05        | 0.8207        |
| 1000-500          | 1e-3          | 1000          | 1e-3          | 2000          | 0.7        | 0.1         | 0.8113        |
| 1000-500          | 1e-3          | 1000          | 1e-3          | 2000          | 0.7        | 0.5         | 0.8113        |
| 1000-500          | 1e-5          | 1500          | 1e-3          | 3000          | 0.7        | 0.001       | 0.8301        |
| 1000-500          | 1e-5          | 1500          | 1e-3          | 3000          | 0.7        | 0.005       | 0.8301        |
| 1000-500          | 1e-5          | 1500          | 1e-3          | 3000          | 0.7        | 0.01        | 0.8301        |
| <b>1000-500</b>   | <b>1e-5</b>   | <b>1500</b>   | <b>1e-3</b>   | <b>3000</b>   | <b>0.7</b> | <b>0.05</b> | <b>0.8490</b> |
| 1000-500          | 1e-5          | 1500          | 1e-3          | 3000          | 0.7        | 0.1         | 0.8301        |
| 1000-500          | 1e-5          | 1500          | 1e-3          | 3000          | 0.7        | 0.5         | 0.8207        |
| 1000-500          | 1e-3          | 1500          | 1e-3          | 3000          | 0.7        | 0.001       | 0.8207        |
| 1000-500          | 1e-3          | 1500          | 1e-3          | 3000          | 0.7        | 0.005       | 0.8207        |
| 1000-500          | 1e-3          | 1500          | 1e-3          | 3000          | 0.7        | 0.01        | 0.8301        |
| 1000-500          | 1e-3          | 1500          | 1e-3          | 3000          | 0.7        | 0.05        | 0.8301        |
| 1000-500          | 1e-3          | 1500          | 1e-3          | 3000          | 0.7        | 0.1         | 0.8301        |
| 1000-500          | 1e-3          | 1500          | 1e-3          | 3000          | 0.7        | 0.5         | 0.8207        |

**Support vector machine (SVM)**

| Kernel | Penalty parameter (C) | RBF kernel coeff (Gamma) | Accruacy |
|--------|-----------------------|--------------------------|----------|
| RBF    | 2 <sup>-5</sup>       | 2 <sup>-15</sup>         | 0.5377   |
| RBF    | 2 <sup>-5</sup>       | 2 <sup>-13</sup>         | 0.5377   |
| RBF    | 2 <sup>-5</sup>       | 2 <sup>-11</sup>         | 0.5377   |
| RBF    | 2 <sup>-5</sup>       | 2 <sup>-9</sup>          | 0.5377   |
| RBF    | 2 <sup>-5</sup>       | 2 <sup>-7</sup>          | 0.5377   |
| RBF    | 2 <sup>-5</sup>       | 2 <sup>-5</sup>          | 0.5377   |
| RBF    | 2 <sup>-5</sup>       | 2 <sup>-3</sup>          | 0.5377   |
| RBF    | 2 <sup>-5</sup>       | 2 <sup>-1</sup>          | 0.5377   |
| RBF    | 2 <sup>-5</sup>       | 2 <sup>1</sup>           | 0.5377   |
| RBF    | 2 <sup>-5</sup>       | 2 <sup>3</sup>           | 0.5377   |
| RBF    | 2 <sup>-3</sup>       | 2 <sup>-15</sup>         | 0.5377   |
| RBF    | 2 <sup>-3</sup>       | 2 <sup>-13</sup>         | 0.5377   |
| RBF    | 2 <sup>-3</sup>       | 2 <sup>-11</sup>         | 0.5755   |
| RBF    | 2 <sup>-3</sup>       | 2 <sup>-9</sup>          | 0.6509   |
| RBF    | 2 <sup>-3</sup>       | 2 <sup>-7</sup>          | 0.6321   |
| RBF    | 2 <sup>-3</sup>       | 2 <sup>-5</sup>          | 0.5377   |
| RBF    | 2 <sup>-3</sup>       | 2 <sup>-3</sup>          | 0.5377   |
| RBF    | 2 <sup>-3</sup>       | 2 <sup>-1</sup>          | 0.5377   |
| RBF    | 2 <sup>-3</sup>       | 2 <sup>1</sup>           | 0.5377   |
| RBF    | 2 <sup>-3</sup>       | 2 <sup>3</sup>           | 0.5377   |
| RBF    | 2 <sup>-1</sup>       | 2 <sup>-15</sup>         | 0.5377   |
| RBF    | 2 <sup>-1</sup>       | 2 <sup>-13</sup>         | 0.5849   |
| RBF    | 2 <sup>-1</sup>       | 2 <sup>-11</sup>         | 0.6509   |
| RBF    | 2 <sup>-1</sup>       | 2 <sup>-9</sup>          | 0.7264   |
| RBF    | 2 <sup>-1</sup>       | 2 <sup>-7</sup>          | 0.6604   |
| RBF    | 2 <sup>-1</sup>       | 2 <sup>-5</sup>          | 0.5566   |
| RBF    | 2 <sup>-1</sup>       | 2 <sup>-3</sup>          | 0.5377   |
| RBF    | 2 <sup>-1</sup>       | 2 <sup>-1</sup>          | 0.5377   |
| RBF    | 2 <sup>-1</sup>       | 2 <sup>1</sup>           | 0.5377   |
| RBF    | 2 <sup>-1</sup>       | 2 <sup>3</sup>           | 0.5377   |
| RBF    | 2 <sup>1</sup>        | 2 <sup>-15</sup>         | 0.5849   |
| RBF    | 2 <sup>1</sup>        | 2 <sup>-13</sup>         | 0.6509   |
| RBF    | 2 <sup>1</sup>        | 2 <sup>-11</sup>         | 0.7547   |
| RBF    | 2 <sup>1</sup>        | 2 <sup>-9</sup>          | 0.8019   |
| RBF    | 2 <sup>1</sup>        | 2 <sup>-7</sup>          | 0.8208   |
| RBF    | 2 <sup>1</sup>        | 2 <sup>-5</sup>          | 0.5849   |
| RBF    | 2 <sup>1</sup>        | 2 <sup>-3</sup>          | 0.5377   |

|            |                      |                        |               |
|------------|----------------------|------------------------|---------------|
| RBF        | 2 <sup>1</sup>       | 2 <sup>-1</sup>        | 0.5377        |
| RBF        | 2 <sup>1</sup>       | 2 <sup>1</sup>         | 0.5377        |
| RBF        | 2 <sup>1</sup>       | 2 <sup>3</sup>         | 0.5377        |
| RBF        | 2 <sup>3</sup>       | 2 <sup>-15</sup>       | 0.6509        |
| RBF        | 2 <sup>3</sup>       | 2 <sup>-13</sup>       | 0.7547        |
| RBF        | 2 <sup>3</sup>       | 2 <sup>-11</sup>       | 0.8019        |
| RBF        | 2 <sup>3</sup>       | 2 <sup>-9</sup>        | 0.8302        |
| RBF        | 2 <sup>3</sup>       | 2 <sup>-7</sup>        | 0.8019        |
| RBF        | 2 <sup>3</sup>       | 2 <sup>-5</sup>        | 0.5849        |
| RBF        | 2 <sup>3</sup>       | 2 <sup>-3</sup>        | 0.5377        |
| RBF        | 2 <sup>3</sup>       | 2 <sup>-1</sup>        | 0.5377        |
| RBF        | 2 <sup>3</sup>       | 2 <sup>1</sup>         | 0.5377        |
| RBF        | 2 <sup>3</sup>       | 2 <sup>3</sup>         | 0.5377        |
| RBF        | 2 <sup>5</sup>       | 2 <sup>-15</sup>       | 0.7642        |
| RBF        | 2 <sup>5</sup>       | 2 <sup>-13</sup>       | 0.8113        |
| <b>RBF</b> | <b>2<sup>5</sup></b> | <b>2<sup>-11</sup></b> | <b>0.8396</b> |
| RBF        | 2 <sup>5</sup>       | 2 <sup>-9</sup>        | 0.8208        |
| RBF        | 2 <sup>5</sup>       | 2 <sup>-7</sup>        | 0.7925        |
| RBF        | 2 <sup>5</sup>       | 2 <sup>-5</sup>        | 0.5849        |
| RBF        | 2 <sup>5</sup>       | 2 <sup>-3</sup>        | 0.5377        |
| RBF        | 2 <sup>5</sup>       | 2 <sup>-1</sup>        | 0.5377        |
| RBF        | 2 <sup>5</sup>       | 2 <sup>1</sup>         | 0.5377        |
| RBF        | 2 <sup>5</sup>       | 2 <sup>3</sup>         | 0.5377        |
| Linear     | 2 <sup>-5</sup>      | -                      | 0.5377        |
| Linear     | 2 <sup>-3</sup>      | -                      | 0.5377        |
| Linear     | 2 <sup>-1</sup>      | -                      | 0.5377        |
| Linear     | 2 <sup>1</sup>       | -                      | 0.6509        |
| Linear     | 2 <sup>3</sup>       | -                      | 0.7547        |
| Linear     | 2 <sup>5</sup>       | -                      | 0.7925        |

#### Random Forest (RF)

| Split criteria<br>(criterion) | # of trees<br>(estimators) | The minimum # of<br>samples in a leaf<br>node<br>(min_samples_leaf) | Accruacy      |
|-------------------------------|----------------------------|---------------------------------------------------------------------|---------------|
| Information gain              | 100                        | 1                                                                   | 0.7453        |
| Information gain              | 100                        | 2                                                                   | 0.7075        |
| Information gain              | 100                        | 3                                                                   | 0.7170        |
| Information gain              | 100                        | 4                                                                   | 0.7170        |
| Information gain              | 100                        | 5                                                                   | 0.7075        |
| Information gain              | 300                        | 1                                                                   | 0.7358        |
| Information gain              | 300                        | 2                                                                   | 0.7170        |
| Information gain              | 300                        | 3                                                                   | 0.7075        |
| Information gain              | 300                        | 4                                                                   | 0.7453        |
| Information gain              | 300                        | 5                                                                   | 0.6981        |
| Information gain              | 500                        | 1                                                                   | 0.7170        |
| Information gain              | 500                        | 2                                                                   | 0.7264        |
| Information gain              | 500                        | 3                                                                   | 0.7358        |
| Information gain              | 500                        | 4                                                                   | 0.7264        |
| Information gain              | 500                        | 5                                                                   | 0.7264        |
| Information gain              | 700                        | 1                                                                   | 0.7075        |
| Information gain              | 700                        | 2                                                                   | 0.7264        |
| Information gain              | 700                        | 3                                                                   | 0.7075        |
| Information gain              | 700                        | 4                                                                   | 0.7264        |
| Information gain              | 700                        | 5                                                                   | 0.7075        |
| Information gain              | 900                        | 1                                                                   | 0.7264        |
| Information gain              | 900                        | 2                                                                   | 0.7170        |
| Information gain              | 900                        | 3                                                                   | 0.7264        |
| Information gain              | 900                        | 4                                                                   | 0.7170        |
| Information gain              | 900                        | 5                                                                   | 0.7170        |
| <b>Gini impurity</b>          | <b>100</b>                 | <b>1</b>                                                            | <b>0.7547</b> |
| Gini impurity                 | 100                        | 2                                                                   | 0.7358        |
| Gini impurity                 | 100                        | 3                                                                   | 0.7453        |
| Gini impurity                 | 100                        | 4                                                                   | 0.7358        |
| Gini impurity                 | 100                        | 5                                                                   | 0.7358        |
| Gini impurity                 | 300                        | 1                                                                   | 0.7358        |
| Gini impurity                 | 300                        | 2                                                                   | 0.7264        |
| Gini impurity                 | 300                        | 3                                                                   | 0.7170        |
| Gini impurity                 | 300                        | 4                                                                   | 0.7264        |
| Gini impurity                 | 300                        | 5                                                                   | 0.7170        |

|               |     |   |        |
|---------------|-----|---|--------|
| Gini impurity | 500 | 1 | 0.7170 |
| Gini impurity | 500 | 2 | 0.7170 |
| Gini impurity | 500 | 3 | 0.7453 |
| Gini impurity | 500 | 4 | 0.7358 |
| Gini impurity | 500 | 5 | 0.7264 |
| Gini impurity | 700 | 1 | 0.7264 |
| Gini impurity | 700 | 2 | 0.7264 |
| Gini impurity | 700 | 3 | 0.7075 |
| Gini impurity | 700 | 4 | 0.7358 |
| Gini impurity | 700 | 5 | 0.7170 |
| Gini impurity | 900 | 1 | 0.7358 |
| Gini impurity | 900 | 2 | 0.7358 |
| Gini impurity | 900 | 3 | 0.7170 |
| Gini impurity | 900 | 4 | 0.7170 |
| Gini impurity | 900 | 5 | 0.7264 |

#### K-nearest neighbors (KNN)

| Weight function<br>(weights) | # of neighbors<br>(n_neighbors) | Accuracy      |
|------------------------------|---------------------------------|---------------|
| uniform                      | 5                               | 0.6887        |
| uniform                      | 10                              | 0.6981        |
| uniform                      | 15                              | 0.6698        |
| uniform                      | 20                              | 0.6604        |
| uniform                      | 25                              | 0.6509        |
| distance                     | 5                               | 0.6792        |
| <b>distance</b>              | <b>10</b>                       | <b>0.6981</b> |
| distance                     | 15                              | 0.6698        |
| distance                     | 20                              | 0.6698        |
| distance                     | 25                              | 0.6509        |

#### Decision Tree (DT)

| Split criteria<br>(criterion) | The minimum # of<br>samples in a leaf<br>node<br>(min_samples_leaf) | Accuracy      |
|-------------------------------|---------------------------------------------------------------------|---------------|
| Information gain              | 1                                                                   | 0.6887        |
| Information gain              | 2                                                                   | 0.6981        |
| <b>Information gain</b>       | <b>3</b>                                                            | <b>0.7075</b> |
| Information gain              | 4                                                                   | 0.6792        |
| Information gain              | 5                                                                   | 0.7075        |
| Gini impurity                 | 1                                                                   | 0.6132        |
| Gini impurity                 | 2                                                                   | 0.6226        |
| Gini impurity                 | 3                                                                   | 0.6509        |
| Gini impurity                 | 4                                                                   | 0.6887        |
| Gini impurity                 | 5                                                                   | 0.6415        |

**Supplementary Material S4.** Performance comparison of meth-SemiCancer with the baseline methods based on 10-fold cross validation (CV) for COAD, GBM, and THCA cancer. The Boxplot for each cancer shows the distribution of MCCs for the classifiers in 10-fold CV of each cancer subtype prediction.

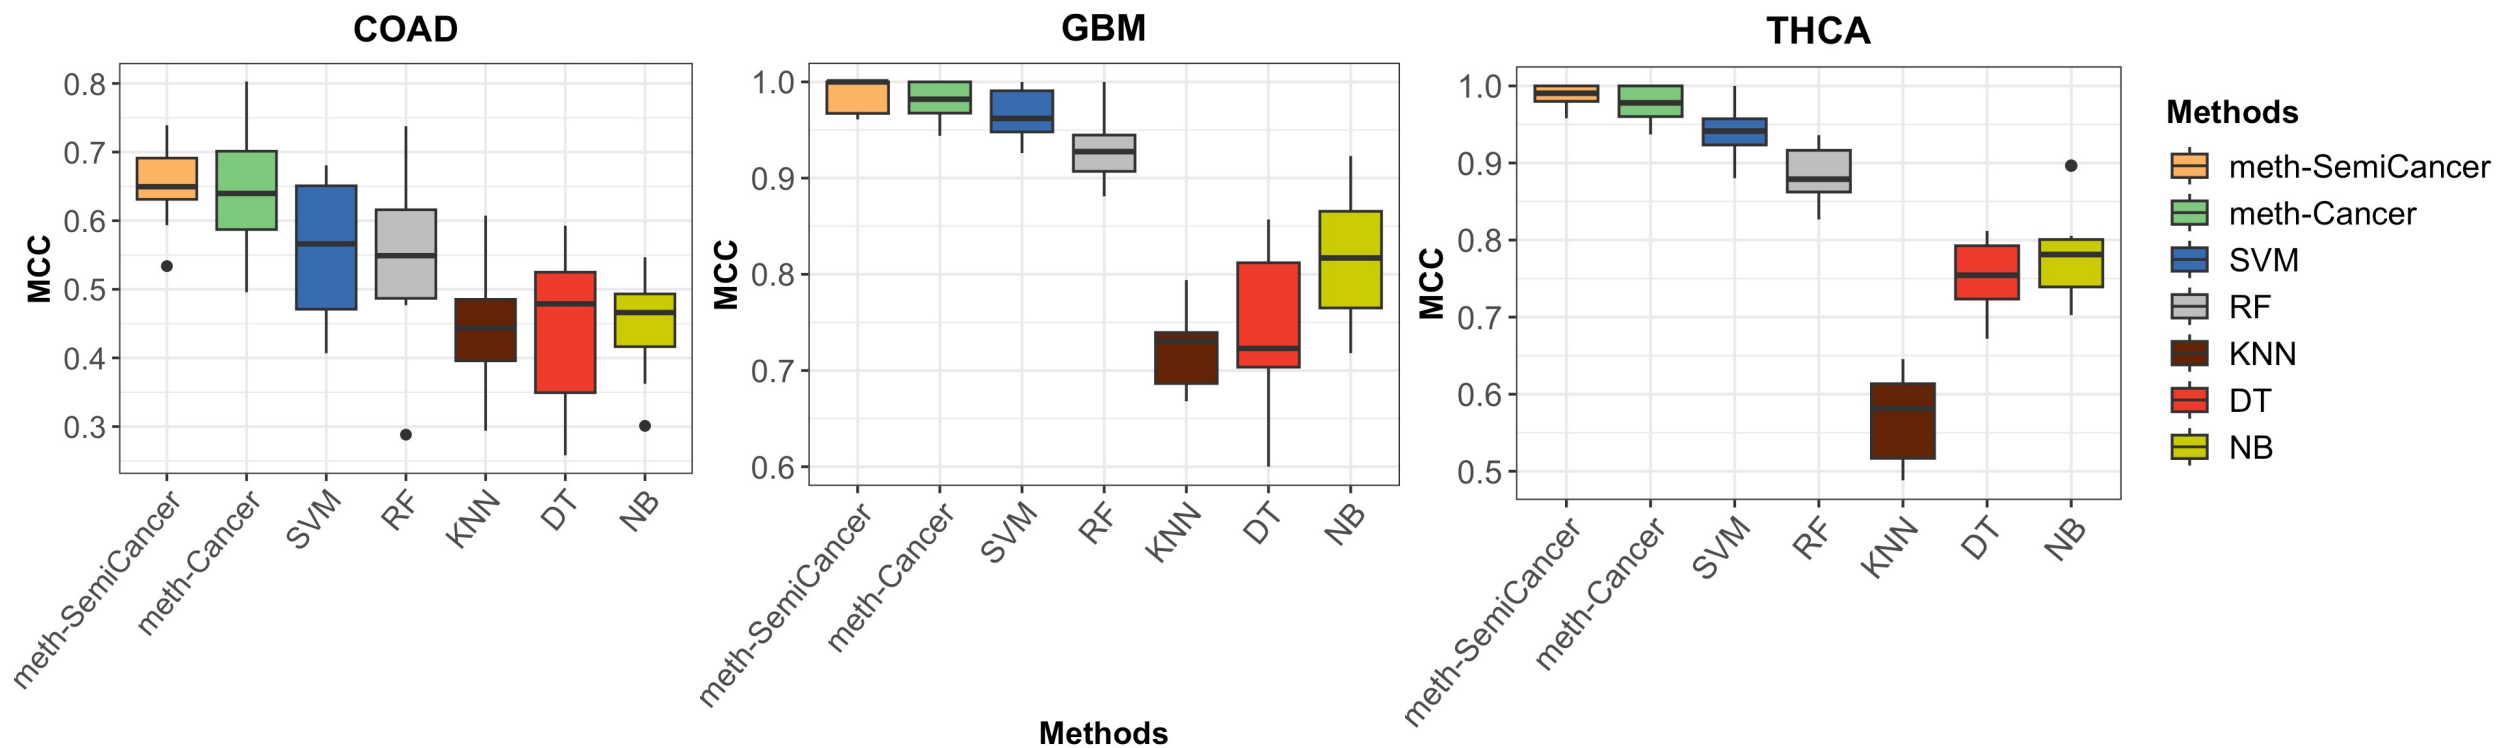

**Supplementary Material S5.**

The average accuracy, weighted F1-score, and Matthews correlation coefficient (MCC), precision, recall, and Cohen's Kappa results of meth-SemiCancer and the baseline methods from the performance evaluation based on 10-fold cross validation.

**[BRCA]**

|           | meth-SemiCancer | meth-Cancer | SVM   | RF    | KNN   | DT    | NB    |
|-----------|-----------------|-------------|-------|-------|-------|-------|-------|
| Accuracy  | 0.836           | 0.805       | 0.814 | 0.715 | 0.702 | 0.702 | 0.617 |
| F1-score  | 0.824           | 0.814       | 0.804 | 0.672 | 0.619 | 0.667 | 0.645 |
| MCC       | 0.755           | 0.719       | 0.712 | 0.538 | 0.536 | 0.533 | 0.461 |
| Precision | 0.822           | 0.739       | 0.756 | 0.605 | 0.663 | 0.522 | 0.567 |
| Recall    | 0.725           | 0.799       | 0.700 | 0.492 | 0.478 | 0.506 | 0.592 |
| Kappa     | 0.743           | 0.724       | 0.714 | 0.551 | 0.464 | 0.484 | 0.450 |

**[COAD]**

|           | meth-SemiCancer | meth-Cancer | SVM   | RF    | KNN   | DT    | NB    |
|-----------|-----------------|-------------|-------|-------|-------|-------|-------|
| Accuracy  | 0.766           | 0.754       | 0.678 | 0.668 | 0.585 | 0.588 | 0.592 |
| F1-score  | 0.769           | 0.752       | 0.678 | 0.665 | 0.566 | 0.592 | 0.580 |
| MCC       | 0.689           | 0.665       | 0.561 | 0.548 | 0.440 | 0.440 | 0.446 |
| Precision | 0.781           | 0.741       | 0.686 | 0.669 | 0.622 | 0.585 | 0.596 |
| Recall    | 0.689           | 0.665       | 0.673 | 0.656 | 0.582 | 0.586 | 0.591 |
| Kappa     | 0.678           | 0.660       | 0.555 | 0.540 | 0.421 | 0.436 | 0.435 |

**[GBM]**

|           | meth-SemiCancer | meth-Cancer | SVM   | RF    | KNN   | DT    | NB    |
|-----------|-----------------|-------------|-------|-------|-------|-------|-------|
| Accuracy  | 0.990           | 0.985       | 0.972 | 0.945 | 0.767 | 0.791 | 0.852 |
| F1-score  | 0.990           | 0.985       | 0.972 | 0.945 | 0.758 | 0.790 | 0.853 |
| MCC       | 0.987           | 0.981       | 0.964 | 0.931 | 0.722 | 0.736 | 0.816 |
| Precision | 0.991           | 0.988       | 0.972 | 0.948 | 0.816 | 0.801 | 0.859 |
| Recall    | 0.991           | 0.984       | 0.975 | 0.947 | 0.796 | 0.805 | 0.867 |
| Kappa     | 0.986           | 0.981       | 0.964 | 0.930 | 0.704 | 0.733 | 0.812 |

**[PRAD]**

|           | meth-SemiCancer | meth-Cancer | SVM   | RF    | KNN   | DT    | NB    |
|-----------|-----------------|-------------|-------|-------|-------|-------|-------|
| Accuracy  | 0.916           | 0.886       | 0.856 | 0.711 | 0.702 | 0.753 | 0.726 |
| F1-score  | 0.913           | 0.882       | 0.841 | 0.675 | 0.661 | 0.739 | 0.694 |
| MCC       | 0.888           | 0.840       | 0.783 | 0.561 | 0.550 | 0.639 | 0.590 |
| Precision | 0.805           | 0.811       | 0.708 | 0.494 | 0.529 | 0.516 | 0.527 |
| Recall    | 0.853           | 0.837       | 0.701 | 0.497 | 0.492 | 0.531 | 0.517 |
| Kappa     | 0.876           | 0.845       | 0.777 | 0.622 | 0.547 | 0.594 | 0.574 |

**[RCC]**

|           | meth-SemiCancer | meth-Cancer | SVM   | RF    | KNN   | DT    | NB    |
|-----------|-----------------|-------------|-------|-------|-------|-------|-------|
| Accuracy  | 0.963           | 0.946       | 0.956 | 0.923 | 0.883 | 0.901 | 0.853 |
| F1-score  | 0.964           | 0.948       | 0.957 | 0.922 | 0.859 | 0.900 | 0.855 |
| MCC       | 0.939           | 0.903       | 0.917 | 0.854 | 0.776 | 0.812 | 0.727 |
| Precision | 0.942           | 0.885       | 0.932 | 0.966 | 0.703 | 0.890 | 0.838 |
| Recall    | 0.903           | 0.964       | 0.949 | 0.929 | 0.661 | 0.883 | 0.843 |
| Kappa     | 0.946           | 0.909       | 0.916 | 0.915 | 0.765 | 0.831 | 0.724 |

**[THCA]**

|           | meth-SemiCancer | meth-Cancer | SVM   | RF    | KNN   | DT    | NB    |
|-----------|-----------------|-------------|-------|-------|-------|-------|-------|
| Accuracy  | 0.990           | 0.984       | 0.958 | 0.918 | 0.578 | 0.828 | 0.841 |
| F1-score  | 0.990           | 0.984       | 0.958 | 0.918 | 0.516 | 0.827 | 0.839 |
| MCC       | 0.986           | 0.977       | 0.940 | 0.882 | 0.569 | 0.752 | 0.777 |
| Precision | 0.992           | 0.980       | 0.953 | 0.908 | 0.686 | 0.805 | 0.796 |
| Recall    | 0.988           | 0.988       | 0.959 | 0.900 | 0.741 | 0.801 | 0.826 |
| Kappa     | 0.986           | 0.977       | 0.939 | 0.880 | 0.476 | 0.749 | 0.772 |

**Supplementary Material S6.**

The average accuracy results of meth-SemiCancer under different sample sizes for pseudo-labeling during fine-tuning based on 10-fold cross-validation.

|             | <b>Simulation dataset</b> |       |       |       |       |
|-------------|---------------------------|-------|-------|-------|-------|
| Sample size | 0                         | 400   | 600   | 800   | 1000  |
| <b>BRCA</b> | 0.805                     | 0.830 | 0.834 | 0.833 | 0.837 |
| <b>PRAD</b> | 0.886                     | 0.897 | 0.895 | 0.898 | 0.910 |
| <b>RCC</b>  | 0.946                     | 0.974 | 0.979 | 0.978 | 0.976 |

|             | <b>Real-studies dataset (GEO)</b> |       |       |       |       |
|-------------|-----------------------------------|-------|-------|-------|-------|
| Sample size | 0%                                | 40%   | 60%   | 80%   | 100%  |
| <b>BRCA</b> | 0.805                             | 0.834 | 0.833 | 0.835 | 0.842 |
| <b>PRAD</b> | 0.886                             | 0.918 | 0.916 | 0.916 | 0.925 |
| <b>RCC</b>  | 0.946                             | 0.969 | 0.970 | 0.974 | 0.968 |

**Supplementary Material S7.**

The number of unlabeled samples utilized during training the meth-SemiCancer for each fine-tuning epoch based on the different confidence threshold.

**[Confidence Threshold 0.5]**

| <b>Fine-tuning epoch</b> | <b>The number of unlabeled samples</b> |
|--------------------------|----------------------------------------|
| 10                       | 523                                    |
| 20                       | 886                                    |
| 30                       | 649                                    |
| 40                       | 1019                                   |
| 50                       | 850                                    |
| 60                       | 705                                    |
| 70                       | 928                                    |
| 80                       | 851                                    |
| 90                       | 833                                    |
| 100                      | 964                                    |
| 110                      | 825                                    |
| 120                      | 1025                                   |
| 130                      | 1024                                   |
| 140                      | 933                                    |
| 150                      | 1085                                   |
| 160                      | 949                                    |
| 170                      | 1026                                   |
| 180                      | 1082                                   |
| 190                      | 1098                                   |
| 200                      | 1145                                   |
| 210                      | 1134                                   |
| 220                      | 1151                                   |
| 230                      | 1181                                   |
| 240                      | 1183                                   |
| 250                      | 1129                                   |
| 260                      | 1209                                   |
| 270                      | 1196                                   |
| 280                      | 918                                    |
| 290                      | 1098                                   |
| 300                      | 1051                                   |
| 310                      | 1153                                   |
| 320                      | 1149                                   |
| 330                      | 1185                                   |
| 340                      | 1165                                   |
| 350                      | 1184                                   |
| 360                      | 1199                                   |
| 370                      | 1206                                   |
| 380                      | 1215                                   |
| 390                      | 1220                                   |
| 400                      | 1223                                   |
| 410                      | 1223                                   |
| 420                      | 1219                                   |
| 430                      | 1224                                   |
| 440                      | 1224                                   |
| 450                      | 1225                                   |
| 460                      | 1225                                   |
| 470                      | 1225                                   |
| 480                      | 1225                                   |
| 490                      | 1225                                   |

|      |      |
|------|------|
| 500  | 1225 |
| 510  | 1225 |
| 520  | 1218 |
| 530  | 1175 |
| 540  | 1222 |
| 550  | 1223 |
| 560  | 1225 |
| 570  | 1225 |
| 580  | 1225 |
| 590  | 1225 |
| 600  | 1225 |
| 610  | 1225 |
| 620  | 1225 |
| 630  | 1225 |
| 640  | 1225 |
| 650  | 1208 |
| 660  | 1224 |
| 670  | 1225 |
| 680  | 1224 |
| 690  | 1225 |
| 700  | 1225 |
| 710  | 1225 |
| 720  | 1225 |
| 730  | 1225 |
| 740  | 1225 |
| 750  | 1225 |
| 760  | 1225 |
| 770  | 1225 |
| 780  | 1225 |
| 790  | 1225 |
| 800  | 1225 |
| 810  | 1225 |
| 820  | 1225 |
| 830  | 1225 |
| 840  | 1225 |
| 850  | 1225 |
| 860  | 1225 |
| 870  | 1225 |
| 880  | 1225 |
| 890  | 1225 |
| 900  | 1225 |
| 910  | 1225 |
| 920  | 1225 |
| 930  | 1225 |
| 940  | 1225 |
| 950  | 1225 |
| 960  | 1225 |
| 970  | 1225 |
| 980  | 1225 |
| 990  | 1225 |
| 1000 | 1225 |
| 1010 | 1224 |
| 1020 | 1225 |
| 1030 | 1225 |
| 1040 | 1225 |
| 1050 | 1225 |

|      |      |
|------|------|
| 1060 | 1225 |
| 1070 | 1225 |
| 1080 | 1176 |
| 1090 | 1109 |
| 1100 | 1202 |
| 1110 | 1203 |
| 1120 | 1196 |
| 1130 | 1197 |
| 1140 | 1210 |
| 1150 | 1218 |
| 1160 | 1219 |
| 1170 | 1220 |
| 1180 | 1221 |
| 1190 | 1222 |
| 1200 | 1221 |
| 1210 | 1222 |
| 1220 | 1221 |
| 1230 | 1224 |
| 1240 | 1223 |
| 1250 | 1222 |
| 1260 | 1223 |
| 1270 | 1224 |
| 1280 | 1224 |
| 1290 | 1225 |
| 1300 | 1225 |
| 1310 | 1224 |
| 1320 | 1224 |
| 1330 | 1225 |
| 1340 | 1225 |
| 1350 | 1225 |
| 1360 | 1225 |
| 1370 | 1225 |
| 1380 | 1225 |
| 1390 | 1225 |
| 1400 | 1225 |
| 1410 | 1225 |
| 1420 | 1225 |
| 1430 | 1225 |
| 1440 | 1225 |
| 1450 | 1225 |
| 1460 | 1225 |
| 1470 | 1225 |
| 1480 | 1225 |
| 1490 | 1225 |
| 1500 | 1225 |
| 1510 | 1225 |
| 1520 | 1225 |
| 1530 | 1225 |
| 1540 | 1225 |
| 1550 | 1225 |
| 1560 | 1225 |
| 1570 | 1225 |
| 1580 | 1225 |
| 1590 | 1225 |
| 1600 | 1225 |
| 1610 | 1225 |

|      |      |
|------|------|
| 1620 | 1225 |
| 1630 | 1225 |
| 1640 | 1225 |
| 1650 | 1225 |
| 1660 | 1225 |
| 1670 | 1225 |
| 1680 | 1225 |
| 1690 | 1225 |
| 1700 | 1225 |
| 1710 | 1225 |
| 1720 | 1225 |
| 1730 | 1224 |
| 1740 | 1225 |
| 1750 | 1225 |
| 1760 | 1225 |
| 1770 | 1225 |
| 1780 | 1225 |
| 1790 | 1225 |
| 1800 | 1225 |
| 1810 | 1225 |
| 1820 | 1225 |
| 1830 | 1225 |
| 1840 | 1225 |
| 1850 | 1225 |
| 1860 | 1225 |
| 1870 | 1225 |
| 1880 | 1225 |
| 1890 | 1225 |
| 1900 | 1225 |
| 1910 | 1225 |
| 1920 | 1225 |
| 1930 | 1225 |
| 1940 | 1225 |
| 1950 | 1225 |
| 1960 | 1225 |
| 1970 | 1225 |
| 1980 | 1225 |
| 1990 | 1225 |
| 2000 | 1225 |
| 2010 | 1225 |
| 2020 | 1225 |
| 2030 | 1225 |
| 2040 | 1225 |
| 2050 | 1225 |
| 2060 | 1225 |
| 2070 | 1157 |
| 2080 | 1168 |
| 2090 | 1188 |
| 2100 | 1191 |
| 2110 | 1210 |
| 2120 | 1214 |
| 2130 | 1221 |
| 2140 | 1222 |
| 2150 | 1225 |
| 2160 | 1224 |
| 2170 | 1225 |

|      |      |
|------|------|
| 2180 | 1225 |
| 2190 | 1225 |
| 2200 | 1225 |
| 2210 | 1218 |
| 2220 | 1223 |
| 2230 | 1225 |
| 2240 | 1224 |
| 2250 | 1224 |
| 2260 | 1225 |
| 2270 | 1225 |
| 2280 | 1225 |
| 2290 | 1225 |
| 2300 | 1225 |
| 2310 | 1225 |
| 2320 | 1217 |
| 2330 | 1225 |
| 2340 | 1225 |
| 2350 | 1225 |
| 2360 | 1225 |
| 2370 | 1225 |
| 2380 | 1225 |
| 2390 | 1225 |
| 2400 | 1225 |
| 2410 | 1225 |
| 2420 | 1225 |
| 2430 | 1225 |
| 2440 | 1225 |
| 2450 | 1225 |
| 2460 | 1225 |
| 2470 | 1225 |
| 2480 | 1225 |
| 2490 | 1225 |
| 2500 | 1225 |
| 2510 | 1197 |
| 2520 | 1224 |
| 2530 | 1206 |
| 2540 | 1221 |
| 2550 | 1224 |
| 2560 | 1223 |
| 2570 | 1225 |
| 2580 | 1225 |
| 2590 | 1225 |
| 2600 | 1225 |
| 2610 | 1225 |
| 2620 | 1225 |
| 2630 | 1225 |
| 2640 | 1225 |
| 2650 | 1225 |
| 2660 | 1225 |
| 2670 | 1225 |
| 2680 | 1225 |
| 2690 | 1225 |
| 2700 | 1225 |
| 2710 | 1225 |
| 2720 | 1225 |
| 2730 | 1225 |

|      |      |
|------|------|
| 2740 | 1225 |
| 2750 | 1225 |
| 2760 | 1225 |
| 2770 | 1225 |
| 2780 | 1225 |
| 2790 | 1225 |
| 2800 | 1225 |
| 2810 | 1225 |
| 2820 | 1225 |
| 2830 | 1225 |
| 2840 | 1225 |
| 2850 | 1225 |
| 2860 | 1225 |
| 2870 | 1225 |
| 2880 | 1225 |
| 2890 | 1225 |
| 2900 | 1225 |
| 2910 | 1225 |
| 2920 | 1225 |
| 2930 | 1225 |
| 2940 | 1225 |
| 2950 | 1225 |
| 2960 | 1225 |
| 2970 | 1225 |
| 2980 | 1225 |
| 2990 | 1225 |
| 3000 | 1225 |

---

**[Confidence Threshold 0.6]**

| <b>Fine-tuning epoch</b> | <b>The number of unlabeled samples</b> |
|--------------------------|----------------------------------------|
| 10                       | 772                                    |
| 20                       | 467                                    |
| 30                       | 304                                    |
| 40                       | 721                                    |
| 50                       | 550                                    |
| 60                       | 466                                    |
| 70                       | 554                                    |
| 80                       | 571                                    |
| 90                       | 533                                    |
| 100                      | 829                                    |
| 110                      | 744                                    |
| 120                      | 717                                    |
| 130                      | 908                                    |
| 140                      | 934                                    |
| 150                      | 809                                    |
| 160                      | 859                                    |
| 170                      | 869                                    |
| 180                      | 1014                                   |
| 190                      | 1036                                   |
| 200                      | 909                                    |
| 210                      | 1092                                   |
| 220                      | 1090                                   |
| 230                      | 1097                                   |
| 240                      | 1068                                   |
| 250                      | 1071                                   |

|     |      |
|-----|------|
| 260 | 905  |
| 270 | 1136 |
| 280 | 1131 |
| 290 | 1156 |
| 300 | 1065 |
| 310 | 1165 |
| 320 | 1178 |
| 330 | 1179 |
| 340 | 1113 |
| 350 | 1181 |
| 360 | 1193 |
| 370 | 1174 |
| 380 | 1134 |
| 390 | 1147 |
| 400 | 1183 |
| 410 | 1218 |
| 420 | 1193 |
| 430 | 1203 |
| 440 | 1220 |
| 450 | 1219 |
| 460 | 1221 |
| 470 | 1222 |
| 480 | 1216 |
| 490 | 1222 |
| 500 | 1221 |
| 510 | 1222 |
| 520 | 1220 |
| 530 | 1225 |
| 540 | 1225 |
| 550 | 1224 |
| 560 | 1224 |
| 570 | 1177 |
| 580 | 1225 |
| 590 | 1224 |
| 600 | 1224 |
| 610 | 1225 |
| 620 | 1224 |
| 630 | 1224 |
| 640 | 1225 |
| 650 | 1225 |
| 660 | 1225 |
| 670 | 1225 |
| 680 | 1225 |
| 690 | 1225 |
| 700 | 1225 |
| 710 | 1225 |
| 720 | 1225 |
| 730 | 1223 |
| 740 | 1225 |
| 750 | 1225 |
| 760 | 1225 |
| 770 | 1225 |
| 780 | 1225 |
| 790 | 1225 |
| 800 | 1225 |
| 810 | 1225 |

|      |      |
|------|------|
| 820  | 1225 |
| 830  | 1225 |
| 840  | 1225 |
| 850  | 1225 |
| 860  | 1221 |
| 870  | 1225 |
| 880  | 1225 |
| 890  | 1225 |
| 900  | 1217 |
| 910  | 1225 |
| 920  | 1225 |
| 930  | 1225 |
| 940  | 1225 |
| 950  | 1224 |
| 960  | 1135 |
| 970  | 1225 |
| 980  | 1225 |
| 990  | 1225 |
| 1000 | 1225 |
| 1010 | 1225 |
| 1020 | 1225 |
| 1030 | 1225 |
| 1040 | 1225 |
| 1050 | 1224 |
| 1060 | 1225 |
| 1070 | 1225 |
| 1080 | 1225 |
| 1090 | 1225 |
| 1100 | 1224 |
| 1110 | 1225 |
| 1120 | 1225 |
| 1130 | 1225 |
| 1140 | 1225 |
| 1150 | 1225 |
| 1160 | 1225 |
| 1170 | 1225 |
| 1180 | 1225 |
| 1190 | 1225 |
| 1200 | 1224 |
| 1210 | 1223 |
| 1220 | 1225 |
| 1230 | 1225 |
| 1240 | 1221 |
| 1250 | 1225 |
| 1260 | 1225 |
| 1270 | 1225 |
| 1280 | 1225 |
| 1290 | 1225 |
| 1300 | 1116 |
| 1310 | 1123 |
| 1320 | 1134 |
| 1330 | 1171 |
| 1340 | 1203 |
| 1350 | 1209 |
| 1360 | 1218 |
| 1370 | 1217 |

|      |      |
|------|------|
| 1380 | 1221 |
| 1390 | 1222 |
| 1400 | 1223 |
| 1410 | 1224 |
| 1420 | 1224 |
| 1430 | 1224 |
| 1440 | 1225 |
| 1450 | 1225 |
| 1460 | 1225 |
| 1470 | 1225 |
| 1480 | 1225 |
| 1490 | 1225 |
| 1500 | 1225 |
| 1510 | 1225 |
| 1520 | 1225 |
| 1530 | 1225 |
| 1540 | 1225 |
| 1550 | 1225 |
| 1560 | 1225 |
| 1570 | 1225 |
| 1580 | 1225 |
| 1590 | 1225 |
| 1600 | 1225 |
| 1610 | 1225 |
| 1620 | 1225 |
| 1630 | 1225 |
| 1640 | 1225 |
| 1650 | 1225 |
| 1660 | 1225 |
| 1670 | 1225 |
| 1680 | 1225 |
| 1690 | 1225 |
| 1700 | 1225 |
| 1710 | 1225 |
| 1720 | 1225 |
| 1730 | 1225 |
| 1740 | 1225 |
| 1750 | 1225 |
| 1760 | 1225 |
| 1770 | 1225 |
| 1780 | 1225 |
| 1790 | 1225 |
| 1800 | 1225 |
| 1810 | 1225 |
| 1820 | 1225 |
| 1830 | 1225 |
| 1840 | 1225 |
| 1850 | 1225 |
| 1860 | 1225 |
| 1870 | 1225 |
| 1880 | 1225 |
| 1890 | 1225 |
| 1900 | 1225 |
| 1910 | 1225 |
| 1920 | 1225 |
| 1930 | 1225 |

|      |      |
|------|------|
| 1940 | 1225 |
| 1950 | 1225 |
| 1960 | 1225 |
| 1970 | 1225 |
| 1980 | 1225 |
| 1990 | 1225 |
| 2000 | 1225 |
| 2010 | 1225 |
| 2020 | 1225 |
| 2030 | 1184 |
| 2040 | 1223 |
| 2050 | 1223 |
| 2060 | 1225 |
| 2070 | 1225 |
| 2080 | 1225 |
| 2090 | 1225 |
| 2100 | 1225 |
| 2110 | 1225 |
| 2120 | 1225 |
| 2130 | 1225 |
| 2140 | 1225 |
| 2150 | 1225 |
| 2160 | 1225 |
| 2170 | 1225 |
| 2180 | 1225 |
| 2190 | 1225 |
| 2200 | 1225 |
| 2210 | 1225 |
| 2220 | 1225 |
| 2230 | 1225 |
| 2240 | 1225 |
| 2250 | 1225 |
| 2260 | 1225 |
| 2270 | 1225 |
| 2280 | 1225 |
| 2290 | 1225 |
| 2300 | 1225 |
| 2310 | 1225 |
| 2320 | 1225 |
| 2330 | 1225 |
| 2340 | 1225 |
| 2350 | 1225 |
| 2360 | 1225 |
| 2370 | 1225 |
| 2380 | 1225 |
| 2390 | 1225 |
| 2400 | 1225 |
| 2410 | 1225 |
| 2420 | 1225 |
| 2430 | 1225 |
| 2440 | 1225 |
| 2450 | 1225 |
| 2460 | 1225 |
| 2470 | 1225 |
| 2480 | 1225 |
| 2490 | 1225 |

|      |      |
|------|------|
| 2500 | 1225 |
| 2510 | 1225 |
| 2520 | 1225 |
| 2530 | 1225 |
| 2540 | 1225 |
| 2550 | 1225 |
| 2560 | 1225 |
| 2570 | 1225 |
| 2580 | 1225 |
| 2590 | 1225 |
| 2600 | 1225 |
| 2610 | 1225 |
| 2620 | 1225 |
| 2630 | 1225 |
| 2640 | 1225 |
| 2650 | 1225 |
| 2660 | 1225 |
| 2670 | 1225 |
| 2680 | 1225 |
| 2690 | 1225 |
| 2700 | 1225 |
| 2710 | 1225 |
| 2720 | 1225 |
| 2730 | 1225 |
| 2740 | 1225 |
| 2750 | 1225 |
| 2760 | 1225 |
| 2770 | 1192 |
| 2780 | 1170 |
| 2790 | 1125 |
| 2800 | 1163 |
| 2810 | 1154 |
| 2820 | 1189 |
| 2830 | 1203 |
| 2840 | 1210 |
| 2850 | 1200 |
| 2860 | 1216 |
| 2870 | 1219 |
| 2880 | 1222 |
| 2890 | 1225 |
| 2900 | 1225 |
| 2910 | 1225 |
| 2920 | 1225 |
| 2930 | 1225 |
| 2940 | 1225 |
| 2950 | 1225 |
| 2960 | 1225 |
| 2970 | 1225 |
| 2980 | 1225 |
| 2990 | 1225 |
| 3000 | 1225 |

---

**[Confidence Threshold 0.7]**

---

| <b>Fine-tuning epoch</b> | <b>The number of unlabeled samples</b> |
|--------------------------|----------------------------------------|
|--------------------------|----------------------------------------|

---

10

666

|     |      |
|-----|------|
| 20  | 506  |
| 30  | 148  |
| 40  | 265  |
| 50  | 499  |
| 60  | 321  |
| 70  | 291  |
| 80  | 462  |
| 90  | 345  |
| 100 | 321  |
| 110 | 509  |
| 120 | 479  |
| 130 | 541  |
| 140 | 592  |
| 150 | 608  |
| 160 | 644  |
| 170 | 723  |
| 180 | 716  |
| 190 | 882  |
| 200 | 904  |
| 210 | 808  |
| 220 | 924  |
| 230 | 1013 |
| 240 | 867  |
| 250 | 947  |
| 260 | 905  |
| 270 | 992  |
| 280 | 873  |
| 290 | 1008 |
| 300 | 1052 |
| 310 | 1017 |
| 320 | 997  |
| 330 | 1058 |
| 340 | 1072 |
| 350 | 1117 |
| 360 | 1144 |
| 370 | 1099 |
| 380 | 1148 |
| 390 | 1141 |
| 400 | 999  |
| 410 | 1091 |
| 420 | 1129 |
| 430 | 1176 |
| 440 | 1167 |
| 450 | 1190 |
| 460 | 1137 |
| 470 | 1196 |
| 480 | 1196 |
| 490 | 1202 |
| 500 | 1191 |
| 510 | 1207 |
| 520 | 1211 |
| 530 | 1207 |
| 540 | 1175 |
| 550 | 1209 |
| 560 | 1170 |
| 570 | 1207 |

|      |      |
|------|------|
| 580  | 1107 |
| 590  | 1212 |
| 600  | 1205 |
| 610  | 1215 |
| 620  | 1214 |
| 630  | 1216 |
| 640  | 1214 |
| 650  | 1219 |
| 660  | 1219 |
| 670  | 1219 |
| 680  | 1219 |
| 690  | 1209 |
| 700  | 1206 |
| 710  | 1213 |
| 720  | 1128 |
| 730  | 1219 |
| 740  | 1219 |
| 750  | 1120 |
| 760  | 1217 |
| 770  | 1222 |
| 780  | 1221 |
| 790  | 1199 |
| 800  | 1221 |
| 810  | 1217 |
| 820  | 1076 |
| 830  | 1223 |
| 840  | 1223 |
| 850  | 1222 |
| 860  | 1221 |
| 870  | 1221 |
| 880  | 1222 |
| 890  | 1217 |
| 900  | 1223 |
| 910  | 1224 |
| 920  | 1224 |
| 930  | 1224 |
| 940  | 1224 |
| 950  | 1222 |
| 960  | 1224 |
| 970  | 1220 |
| 980  | 1224 |
| 990  | 1224 |
| 1000 | 1219 |
| 1010 | 1224 |
| 1020 | 1224 |
| 1030 | 1224 |
| 1040 | 1224 |
| 1050 | 1224 |
| 1060 | 1211 |
| 1070 | 1225 |
| 1080 | 1225 |
| 1090 | 1225 |
| 1100 | 1225 |
| 1110 | 1224 |
| 1120 | 1225 |
| 1130 | 1224 |

|      |      |
|------|------|
| 1140 | 979  |
| 1150 | 1144 |
| 1160 | 1172 |
| 1170 | 1186 |
| 1180 | 1199 |
| 1190 | 1208 |
| 1200 | 1209 |
| 1210 | 1202 |
| 1220 | 1218 |
| 1230 | 1219 |
| 1240 | 1218 |
| 1250 | 1221 |
| 1260 | 1220 |
| 1270 | 1223 |
| 1280 | 1224 |
| 1290 | 1224 |
| 1300 | 1224 |
| 1310 | 1224 |
| 1320 | 1224 |
| 1330 | 1224 |
| 1340 | 1224 |
| 1350 | 1224 |
| 1360 | 1224 |
| 1370 | 1224 |
| 1380 | 1224 |
| 1390 | 1224 |
| 1400 | 1224 |
| 1410 | 1224 |
| 1420 | 1224 |
| 1430 | 1224 |
| 1440 | 1225 |
| 1450 | 1225 |
| 1460 | 1225 |
| 1470 | 1225 |
| 1480 | 1225 |
| 1490 | 1225 |
| 1500 | 1225 |
| 1510 | 1225 |
| 1520 | 1225 |
| 1530 | 1225 |
| 1540 | 1225 |
| 1550 | 1225 |
| 1560 | 1220 |
| 1570 | 1225 |
| 1580 | 1225 |
| 1590 | 1225 |
| 1600 | 1225 |
| 1610 | 1225 |
| 1620 | 1225 |
| 1630 | 1225 |
| 1640 | 1225 |
| 1650 | 1225 |
| 1660 | 1225 |
| 1670 | 1225 |
| 1680 | 1225 |
| 1690 | 1225 |

|      |      |
|------|------|
| 1700 | 1225 |
| 1710 | 1225 |
| 1720 | 1225 |
| 1730 | 1225 |
| 1740 | 1225 |
| 1750 | 1225 |
| 1760 | 1224 |
| 1770 | 1225 |
| 1780 | 1225 |
| 1790 | 1225 |
| 1800 | 1225 |
| 1810 | 1225 |
| 1820 | 1225 |
| 1830 | 1225 |
| 1840 | 1225 |
| 1850 | 1225 |
| 1860 | 1225 |
| 1870 | 1225 |
| 1880 | 1225 |
| 1890 | 1225 |
| 1900 | 968  |
| 1910 | 1161 |
| 1920 | 1110 |
| 1930 | 1146 |
| 1940 | 1191 |
| 1950 | 1195 |
| 1960 | 1185 |
| 1970 | 1210 |
| 1980 | 1209 |
| 1990 | 1221 |
| 2000 | 1223 |
| 2010 | 1223 |
| 2020 | 1225 |
| 2030 | 1225 |
| 2040 | 1225 |
| 2050 | 1225 |
| 2060 | 1225 |
| 2070 | 1225 |
| 2080 | 1225 |
| 2090 | 1225 |
| 2100 | 1225 |
| 2110 | 1225 |
| 2120 | 1225 |
| 2130 | 1225 |
| 2140 | 1225 |
| 2150 | 1225 |
| 2160 | 1225 |
| 2170 | 1225 |
| 2180 | 1225 |
| 2190 | 1225 |
| 2200 | 1225 |
| 2210 | 1225 |
| 2220 | 1225 |
| 2230 | 1225 |
| 2240 | 1225 |
| 2250 | 1225 |

|      |      |
|------|------|
| 2260 | 1225 |
| 2270 | 1225 |
| 2280 | 1225 |
| 2290 | 1225 |
| 2300 | 1225 |
| 2310 | 1225 |
| 2320 | 1225 |
| 2330 | 1225 |
| 2340 | 1225 |
| 2350 | 1225 |
| 2360 | 1225 |
| 2370 | 1225 |
| 2380 | 1225 |
| 2390 | 1225 |
| 2400 | 1225 |
| 2410 | 1225 |
| 2420 | 1225 |
| 2430 | 1225 |
| 2440 | 1201 |
| 2450 | 1225 |
| 2460 | 1225 |
| 2470 | 1225 |
| 2480 | 1225 |
| 2490 | 1225 |
| 2500 | 1225 |
| 2510 | 1225 |
| 2520 | 1225 |
| 2530 | 1225 |
| 2540 | 1225 |
| 2550 | 1225 |
| 2560 | 1225 |
| 2570 | 1225 |
| 2580 | 1225 |
| 2590 | 1225 |
| 2600 | 1225 |
| 2610 | 1225 |
| 2620 | 1225 |
| 2630 | 1225 |
| 2640 | 1225 |
| 2650 | 1225 |
| 2660 | 1225 |
| 2670 | 1225 |
| 2680 | 1225 |
| 2690 | 1225 |
| 2700 | 1225 |
| 2710 | 1225 |
| 2720 | 1225 |
| 2730 | 1225 |
| 2740 | 1225 |
| 2750 | 1225 |
| 2760 | 1225 |
| 2770 | 1225 |
| 2780 | 1225 |
| 2790 | 1225 |
| 2800 | 1225 |
| 2810 | 1225 |

|      |      |
|------|------|
| 2820 | 1225 |
| 2830 | 1225 |
| 2840 | 1225 |
| 2850 | 1225 |
| 2860 | 1225 |
| 2870 | 1225 |
| 2880 | 1225 |
| 2890 | 1225 |
| 2900 | 1225 |
| 2910 | 1225 |
| 2920 | 1225 |
| 2930 | 1225 |
| 2940 | 1225 |
| 2950 | 1225 |
| 2960 | 1225 |
| 2970 | 1225 |
| 2980 | 1225 |
| 2990 | 1225 |
| 3000 | 1225 |

---

**[Confidence Threshold 0.8]**

| <b>Fine-tuning epoch</b> | <b>The number of unlabeled samples</b> |
|--------------------------|----------------------------------------|
| 10                       | 492                                    |
| 20                       | 344                                    |
| 30                       | 195                                    |
| 40                       | 106                                    |
| 50                       | 191                                    |
| 60                       | 260                                    |
| 70                       | 149                                    |
| 80                       | 120                                    |
| 90                       | 310                                    |
| 100                      | 426                                    |
| 110                      | 288                                    |
| 120                      | 232                                    |
| 130                      | 361                                    |
| 140                      | 384                                    |
| 150                      | 336                                    |
| 160                      | 425                                    |
| 170                      | 541                                    |
| 180                      | 581                                    |
| 190                      | 574                                    |
| 200                      | 517                                    |
| 210                      | 727                                    |
| 220                      | 675                                    |
| 230                      | 632                                    |
| 240                      | 749                                    |
| 250                      | 838                                    |
| 260                      | 676                                    |
| 270                      | 875                                    |
| 280                      | 800                                    |
| 290                      | 711                                    |
| 300                      | 877                                    |
| 310                      | 901                                    |
| 320                      | 944                                    |
| 330                      | 944                                    |

|     |      |
|-----|------|
| 340 | 964  |
| 350 | 947  |
| 360 | 991  |
| 370 | 998  |
| 380 | 985  |
| 390 | 1005 |
| 400 | 932  |
| 410 | 923  |
| 420 | 964  |
| 430 | 1058 |
| 440 | 765  |
| 450 | 1055 |
| 460 | 1087 |
| 470 | 1042 |
| 480 | 1100 |
| 490 | 1107 |
| 500 | 1081 |
| 510 | 1115 |
| 520 | 1119 |
| 530 | 1119 |
| 540 | 1122 |
| 550 | 1121 |
| 560 | 1125 |
| 570 | 905  |
| 580 | 1113 |
| 590 | 1080 |
| 600 | 1085 |
| 610 | 1137 |
| 620 | 1146 |
| 630 | 1137 |
| 640 | 1078 |
| 650 | 1154 |
| 660 | 1135 |
| 670 | 1160 |
| 680 | 1159 |
| 690 | 1136 |
| 700 | 1178 |
| 710 | 1178 |
| 720 | 1171 |
| 730 | 1156 |
| 740 | 1186 |
| 750 | 1185 |
| 760 | 1154 |
| 770 | 1179 |
| 780 | 532  |
| 790 | 928  |
| 800 | 656  |
| 810 | 896  |
| 820 | 748  |
| 830 | 1076 |
| 840 | 1128 |
| 850 | 1122 |
| 860 | 1124 |
| 870 | 1138 |
| 880 | 1190 |
| 890 | 1162 |

|      |      |
|------|------|
| 900  | 1193 |
| 910  | 1196 |
| 920  | 1195 |
| 930  | 1138 |
| 940  | 1198 |
| 950  | 1196 |
| 960  | 1200 |
| 970  | 1200 |
| 980  | 1204 |
| 990  | 1194 |
| 1000 | 1197 |
| 1010 | 1203 |
| 1020 | 1186 |
| 1030 | 1202 |
| 1040 | 1203 |
| 1050 | 1204 |
| 1060 | 1203 |
| 1070 | 1203 |
| 1080 | 1204 |
| 1090 | 1205 |
| 1100 | 1203 |
| 1110 | 1205 |
| 1120 | 1205 |
| 1130 | 1205 |
| 1140 | 1205 |
| 1150 | 1206 |
| 1160 | 1204 |
| 1170 | 1208 |
| 1180 | 1205 |
| 1190 | 1205 |
| 1200 | 1206 |
| 1210 | 1206 |
| 1220 | 1206 |
| 1230 | 1208 |
| 1240 | 1208 |
| 1250 | 1209 |
| 1260 | 1208 |
| 1270 | 1209 |
| 1280 | 1209 |
| 1290 | 1210 |
| 1300 | 1210 |
| 1310 | 1209 |
| 1320 | 1210 |
| 1330 | 1210 |
| 1340 | 1210 |
| 1350 | 1210 |
| 1360 | 1210 |
| 1370 | 1210 |
| 1380 | 1210 |
| 1390 | 1208 |
| 1400 | 1210 |
| 1410 | 1210 |
| 1420 | 1210 |
| 1430 | 1210 |
| 1440 | 1210 |
| 1450 | 1210 |

|      |      |
|------|------|
| 1460 | 1209 |
| 1470 | 1211 |
| 1480 | 1211 |
| 1490 | 1211 |
| 1500 | 1211 |
| 1510 | 1211 |
| 1520 | 1211 |
| 1530 | 1211 |
| 1540 | 1211 |
| 1550 | 1211 |
| 1560 | 1211 |
| 1570 | 1211 |
| 1580 | 1211 |
| 1590 | 1211 |
| 1600 | 1211 |
| 1610 | 1211 |
| 1620 | 1211 |
| 1630 | 1211 |
| 1640 | 1211 |
| 1650 | 1212 |
| 1660 | 1215 |
| 1670 | 1216 |
| 1680 | 1216 |
| 1690 | 1216 |
| 1700 | 1216 |
| 1710 | 1216 |
| 1720 | 1216 |
| 1730 | 1215 |
| 1740 | 1216 |
| 1750 | 1216 |
| 1760 | 1216 |
| 1770 | 1216 |
| 1780 | 1216 |
| 1790 | 1216 |
| 1800 | 1216 |
| 1810 | 1216 |
| 1820 | 1216 |
| 1830 | 1216 |
| 1840 | 1216 |
| 1850 | 1216 |
| 1860 | 1216 |
| 1870 | 1218 |
| 1880 | 1218 |
| 1890 | 1218 |
| 1900 | 1218 |
| 1910 | 1219 |
| 1920 | 1219 |
| 1930 | 1219 |
| 1940 | 1219 |
| 1950 | 1219 |
| 1960 | 1219 |
| 1970 | 1220 |
| 1980 | 1221 |
| 1990 | 1221 |
| 2000 | 697  |
| 2010 | 993  |

|      |      |
|------|------|
| 2020 | 1071 |
| 2030 | 1154 |
| 2040 | 1168 |
| 2050 | 1178 |
| 2060 | 1179 |
| 2070 | 1187 |
| 2080 | 1182 |
| 2090 | 1184 |
| 2100 | 1200 |
| 2110 | 1201 |
| 2120 | 1210 |
| 2130 | 1212 |
| 2140 | 1215 |
| 2150 | 1217 |
| 2160 | 1214 |
| 2170 | 1216 |
| 2180 | 1217 |
| 2190 | 1209 |
| 2200 | 1217 |
| 2210 | 1217 |
| 2220 | 1217 |
| 2230 | 1218 |
| 2240 | 1218 |
| 2250 | 1218 |
| 2260 | 1218 |
| 2270 | 1218 |
| 2280 | 1218 |
| 2290 | 1218 |
| 2300 | 1218 |
| 2310 | 1218 |
| 2320 | 1218 |
| 2330 | 1218 |
| 2340 | 1218 |
| 2350 | 1218 |
| 2360 | 1166 |
| 2370 | 1213 |
| 2380 | 1215 |
| 2390 | 1185 |
| 2400 | 1219 |
| 2410 | 1219 |
| 2420 | 1222 |
| 2430 | 1222 |
| 2440 | 1222 |
| 2450 | 1222 |
| 2460 | 1222 |
| 2470 | 1222 |
| 2480 | 1222 |
| 2490 | 1222 |
| 2500 | 1222 |
| 2510 | 1222 |
| 2520 | 1222 |
| 2530 | 1222 |
| 2540 | 1222 |
| 2550 | 1222 |
| 2560 | 1222 |
| 2570 | 1222 |

|      |      |
|------|------|
| 2580 | 1222 |
| 2590 | 1222 |
| 2600 | 1222 |
| 2610 | 1223 |
| 2620 | 1223 |
| 2630 | 1223 |
| 2640 | 1223 |
| 2650 | 1223 |
| 2660 | 1223 |
| 2670 | 1223 |
| 2680 | 1223 |
| 2690 | 1223 |
| 2700 | 1222 |
| 2710 | 1223 |
| 2720 | 1223 |
| 2730 | 1223 |
| 2740 | 1223 |
| 2750 | 1223 |
| 2760 | 1223 |
| 2770 | 1223 |
| 2780 | 1223 |
| 2790 | 1223 |
| 2800 | 1223 |
| 2810 | 1224 |
| 2820 | 1224 |
| 2830 | 1224 |
| 2840 | 1224 |
| 2850 | 1224 |
| 2860 | 1224 |
| 2870 | 1224 |
| 2880 | 1224 |
| 2890 | 1224 |
| 2900 | 1224 |
| 2910 | 1224 |
| 2920 | 1224 |
| 2930 | 1224 |
| 2940 | 1224 |
| 2950 | 1224 |
| 2960 | 1224 |
| 2970 | 1224 |
| 2980 | 1224 |
| 2990 | 1224 |
| 3000 | 1224 |

---

**[Confidence Threshold 0.9]**

| <b>Fine-tuning epoch</b> | <b>The number of unlabeled samples</b> |
|--------------------------|----------------------------------------|
| 10                       | 80                                     |
| 20                       | 79                                     |
| 30                       | 29                                     |
| 40                       | 106                                    |
| 50                       | 57                                     |
| 60                       | 186                                    |
| 70                       | 45                                     |
| 80                       | 326                                    |
| 90                       | 106                                    |

|     |      |
|-----|------|
| 100 | 342  |
| 110 | 122  |
| 120 | 324  |
| 130 | 102  |
| 140 | 353  |
| 150 | 117  |
| 160 | 305  |
| 170 | 133  |
| 180 | 576  |
| 190 | 150  |
| 200 | 621  |
| 210 | 279  |
| 220 | 358  |
| 230 | 376  |
| 240 | 362  |
| 250 | 735  |
| 260 | 561  |
| 270 | 336  |
| 280 | 530  |
| 290 | 519  |
| 300 | 522  |
| 310 | 526  |
| 320 | 890  |
| 330 | 905  |
| 340 | 840  |
| 350 | 821  |
| 360 | 939  |
| 370 | 619  |
| 380 | 948  |
| 390 | 941  |
| 400 | 943  |
| 410 | 947  |
| 420 | 890  |
| 430 | 932  |
| 440 | 704  |
| 450 | 934  |
| 460 | 965  |
| 470 | 935  |
| 480 | 986  |
| 490 | 625  |
| 500 | 971  |
| 510 | 946  |
| 520 | 905  |
| 530 | 997  |
| 540 | 845  |
| 550 | 988  |
| 560 | 901  |
| 570 | 1010 |
| 580 | 1026 |
| 590 | 1029 |
| 600 | 760  |
| 610 | 1002 |
| 620 | 976  |
| 630 | 1034 |
| 640 | 1032 |
| 650 | 1003 |

|      |      |
|------|------|
| 660  | 967  |
| 670  | 1047 |
| 680  | 1050 |
| 690  | 1053 |
| 700  | 1053 |
| 710  | 1055 |
| 720  | 1050 |
| 730  | 1062 |
| 740  | 1049 |
| 750  | 1055 |
| 760  | 1039 |
| 770  | 1056 |
| 780  | 1063 |
| 790  | 1035 |
| 800  | 1058 |
| 810  | 1054 |
| 820  | 1065 |
| 830  | 1069 |
| 840  | 949  |
| 850  | 1072 |
| 860  | 1072 |
| 870  | 1077 |
| 880  | 1069 |
| 890  | 1078 |
| 900  | 1067 |
| 910  | 1079 |
| 920  | 1077 |
| 930  | 1081 |
| 940  | 1079 |
| 950  | 1067 |
| 960  | 1088 |
| 970  | 1090 |
| 980  | 1088 |
| 990  | 964  |
| 1000 | 763  |
| 1010 | 540  |
| 1020 | 506  |
| 1030 | 851  |
| 1040 | 715  |
| 1050 | 1044 |
| 1060 | 1079 |
| 1070 | 1082 |
| 1080 | 1091 |
| 1090 | 1092 |
| 1100 | 1129 |
| 1110 | 1121 |
| 1120 | 1119 |
| 1130 | 1117 |
| 1140 | 1137 |
| 1150 | 1142 |
| 1160 | 1140 |
| 1170 | 1145 |
| 1180 | 1142 |
| 1190 | 1146 |
| 1200 | 1146 |
| 1210 | 1149 |

|      |      |
|------|------|
| 1220 | 1149 |
| 1230 | 1149 |
| 1240 | 1152 |
| 1250 | 1148 |
| 1260 | 1156 |
| 1270 | 1158 |
| 1280 | 1157 |
| 1290 | 1157 |
| 1300 | 1158 |
| 1310 | 1158 |
| 1320 | 1159 |
| 1330 | 1162 |
| 1340 | 1168 |
| 1350 | 1163 |
| 1360 | 1167 |
| 1370 | 1165 |
| 1380 | 1169 |
| 1390 | 1168 |
| 1400 | 1169 |
| 1410 | 1170 |
| 1420 | 1163 |
| 1430 | 1170 |
| 1440 | 1170 |
| 1450 | 1170 |
| 1460 | 1170 |
| 1470 | 1170 |
| 1480 | 1170 |
| 1490 | 1170 |
| 1500 | 1171 |
| 1510 | 1171 |
| 1520 | 1171 |
| 1530 | 1171 |
| 1540 | 1172 |
| 1550 | 1172 |
| 1560 | 1173 |
| 1570 | 1172 |
| 1580 | 1172 |
| 1590 | 1137 |
| 1600 | 1173 |
| 1610 | 1173 |
| 1620 | 1174 |
| 1630 | 1174 |
| 1640 | 1174 |
| 1650 | 1174 |
| 1660 | 1083 |
| 1670 | 1159 |
| 1680 | 1162 |
| 1690 | 1175 |
| 1700 | 1178 |
| 1710 | 1177 |
| 1720 | 1178 |
| 1730 | 1178 |
| 1740 | 1181 |
| 1750 | 1183 |
| 1760 | 1183 |
| 1770 | 1183 |

|      |      |
|------|------|
| 1780 | 1183 |
| 1790 | 1183 |
| 1800 | 1183 |
| 1810 | 1183 |
| 1820 | 1184 |
| 1830 | 1184 |
| 1840 | 1166 |
| 1850 | 1181 |
| 1860 | 1188 |
| 1870 | 1191 |
| 1880 | 1192 |
| 1890 | 1189 |
| 1900 | 1192 |
| 1910 | 1199 |
| 1920 | 1197 |
| 1930 | 1197 |
| 1940 | 842  |
| 1950 | 421  |
| 1960 | 710  |
| 1970 | 719  |
| 1980 | 921  |
| 1990 | 956  |
| 2000 | 996  |
| 2010 | 1012 |
| 2020 | 1025 |
| 2030 | 1032 |
| 2040 | 1041 |
| 2050 | 1049 |
| 2060 | 1057 |
| 2070 | 1052 |
| 2080 | 1075 |
| 2090 | 1064 |
| 2100 | 1057 |
| 2110 | 1065 |
| 2120 | 1070 |
| 2130 | 1081 |
| 2140 | 1082 |
| 2150 | 1081 |
| 2160 | 1093 |
| 2170 | 1095 |
| 2180 | 1096 |
| 2190 | 1097 |
| 2200 | 1097 |
| 2210 | 1097 |
| 2220 | 1104 |
| 2230 | 1103 |
| 2240 | 1105 |
| 2250 | 1106 |
| 2260 | 1108 |
| 2270 | 1109 |
| 2280 | 1123 |
| 2290 | 1114 |
| 2300 | 1112 |
| 2310 | 1126 |
| 2320 | 1126 |
| 2330 | 1123 |

|      |      |
|------|------|
| 2340 | 1120 |
| 2350 | 1132 |
| 2360 | 1125 |
| 2370 | 1148 |
| 2380 | 1136 |
| 2390 | 1128 |
| 2400 | 1136 |
| 2410 | 1141 |
| 2420 | 1134 |
| 2430 | 1145 |
| 2440 | 1147 |
| 2450 | 1148 |
| 2460 | 1144 |
| 2470 | 1159 |
| 2480 | 1159 |
| 2490 | 1142 |
| 2500 | 1151 |
| 2510 | 1177 |
| 2520 | 1186 |
| 2530 | 1178 |
| 2540 | 1187 |
| 2550 | 1186 |
| 2560 | 1184 |
| 2570 | 1185 |
| 2580 | 1181 |
| 2590 | 1192 |
| 2600 | 1188 |
| 2610 | 1188 |
| 2620 | 1187 |
| 2630 | 1188 |
| 2640 | 1203 |
| 2650 | 1192 |
| 2660 | 1203 |
| 2670 | 1194 |
| 2680 | 1197 |
| 2690 | 1196 |
| 2700 | 1203 |
| 2710 | 1206 |
| 2720 | 1206 |
| 2730 | 1208 |
| 2740 | 1191 |
| 2750 | 1192 |
| 2760 | 1156 |
| 2770 | 1093 |
| 2780 | 1207 |
| 2790 | 1212 |
| 2800 | 1193 |
| 2810 | 1216 |
| 2820 | 1216 |
| 2830 | 1214 |
| 2840 | 1153 |
| 2850 | 1209 |
| 2860 | 1216 |
| 2870 | 1215 |
| 2880 | 1217 |
| 2890 | 1217 |

|      |      |
|------|------|
| 2900 | 1207 |
| 2910 | 1219 |
| 2920 | 1219 |
| 2930 | 1218 |
| 2940 | 1219 |
| 2950 | 1219 |
| 2960 | 1219 |
| 2970 | 1218 |
| 2980 | 1219 |
| 2990 | 1219 |
| 3000 | 1219 |

---
